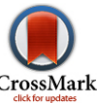

## Correction

# Correction: Neurologic Abnormalities in Mouse Models of the Lysosomal Storage Disorders Mucopolidosis II and Mucopolidosis III $\gamma$

The PLOS ONE Staff

## Notice of Republication

This article was republished on October 28, 2014, due to multiple instances of "Gnptab-/-" being published as "Gnptg-/-". The publisher apologizes for this error. Please download the article again to view the corrected version. The originally published, uncorrected article and the republished, corrected article are provided here for reference.

## Supporting Information

**File S1** Originally published, uncorrected article (PDF)

**File S2** Republished, corrected article (PDF)

## Reference

1. Idol RA, Wozniak DF, Fujiwara H, Yuede CM, Ory DS, et al. (2014) Neurologic Abnormalities in Mouse Models of the Lysosomal Storage Disorders Mucopolidosis II and Mucopolidosis III  $\gamma$ . PLoS ONE 9(10): e109768. doi:10.1371/journal.pone.0109768

**Citation:** The PLOS ONE Staff (2014) Correction: Neurologic Abnormalities in Mouse Models of the Lysosomal Storage Disorders Mucopolidosis II and Mucopolidosis III  $\gamma$ . PLoS ONE 9(11): e114199. doi:10.1371/journal.pone.0114199

**Published:** November 18, 2014

**Copyright:** © 2014 The PLOS ONE Staff. This is an open-access article distributed under the terms of the Creative Commons Attribution License, which permits unrestricted use, distribution, and reproduction in any medium, provided the original author and source are credited.
